# 1 **Rapid inactivation of vaccinia, a surrogate virus for monkeypox and smallpox, using** 2 **ultraviolet-C disinfection**

3  
4 Carolina Koutras PhD, MSc<sup>a</sup>, Richard L. Wade PhD, MPH<sup>a</sup>

5 <sup>a</sup>Department of Clinical Research, R-Zero Systems, Salt Lake City, UT

6  
7 Key Words: Ultraviolet-C, Infection Prevention, Monkeypox, Biosafety

8  
9 Conflict of Interest: Dr. Koutras and Dr. Wade work for R-Zero Systems, a company that  
10 researches and manufactures UV-C technologies.

## 11 12 **Abstract**

13  
14 Human monkeypox is an emerging health threat that has the potential to cause serious sequelae.  
15 Ultraviolet-C (UV-C) disinfection is a physical process that triggers microbial inactivation  
16 through irreversible DNA damage. A high-output mobile UV-C unit was evaluated against  
17 vaccinia, a monkeypox surrogate, for antimicrobial efficacy. In under 7 minutes, a single UV-C  
18 cycle had a virucidal efficacy of  $\geq 99.996\%$  in a 200 sq feet area. UV-C technology is a  
19 promising strategy for infection prevention and control in the post-COVID era.

## 20 21 **Background**

22  
23 Human monkeypox is a rare viral zoonosis caused by the monkeypox virus belonging to the  
24 genus *Orthopoxvirus* of the *Poxviridae* family. Endemic to central and western Africa, human  
25 monkeypox has recently emerged in the USA and was declared a public health emergency of  
26 international concern. *Poxviridae* are a diverse group of large double-stranded DNA viruses that  
27 replicate exclusively in the cytoplasm of infected cells. The most well-known member of the  
28 *Orthopoxvirus* genus is the now extinct variola virus, the causative agent of smallpox. Other  
29 notable members of the genus include the vaccinia virus, which is used in the current smallpox  
30 vaccine, and cowpox virus. These viruses are similar in terms of size, shape, replication, and  
31 structure. With few exceptions, they fail to trigger a chain of transmission in humans and remain  
32 zoonotic. However, outbreaks of human monkeypox have emerged in the last 50 years and are of  
33 concern for several reasons. There is currently no proven treatment for human monkeypox;  
34 clinical efficacy data on the use of smallpox vaccines against monkeypox is lacking; the  
35 virulence and transmissibility of monkeypox in humans is not fully understood; the disease has  
36 the potential to result in major disease sequelae, including disfiguring scars and permanent  
37 corneal lesions; and finally, monkeypox virions can persist in the environment for long periods  
38 of time.<sup>1-4</sup> The goal of this study was to evaluate the efficacy of an ultraviolet-C (UV-C) whole-  
39 room disinfection tower against monkeypox on contact surfaces, using the highly similar  
40 vaccinia virus as a surrogate.

## 41 42 **Methods**

43  
44 Three replicates of glass test and control carriers were inoculated with a 0.2 ml volume of viral  
45 suspension (modified vaccinia virus Ankara strain, ATCC VR-1508) and dried at ambient room  
46 temperature (19.2-19.4°C) and 48% relative humidity (RH). A 78” tall UV-C device equipped

47 with 8 high-output lamps and reflectors, and 4 long-range passive infrared safety sensors (Arc,  
 48 R-Zero Systems) was placed at 8 feet (~200 sq feet radius) from the test carriers. Carriers were  
 49 exposed to UV-C light for 6 minutes and 52 seconds in total. Following harvest of test and  
 50 control carriers, the viral suspensions were quantified using the TCID<sub>50</sub> (Median Tissue Culture  
 51 Infectivity Dose) technique. The inoculated cell culture plates were incubated for a few days and  
 52 microscopically scored for the presence/absence of the test virus. The Spearman-Kärber method  
 53 was used for estimating viral titers. The log<sub>10</sub> and percent reductions in viral titer were  
 54 calculated for UV-C exposed carriers relative to controls. The study diagram is shown in Figure  
 55 1.  
 56

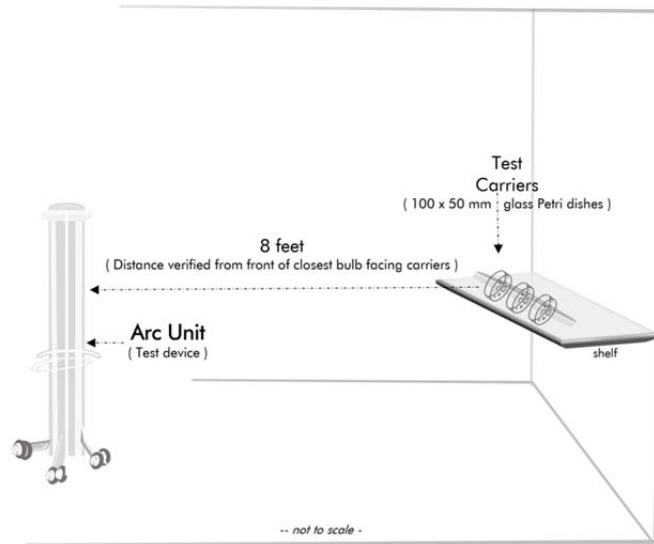

57  
 58  
 59 Figure 1. Study Diagram. The test device was placed at an 8-foot distance from the test carriers.  
 60

## 61 Results

62  
 63 Table 1 summarizes the TCID<sub>50</sub> per carrier, and average TCID<sub>50</sub> for both test and control  
 64 conditions. The recovery control plate had an average viral titer of 5.30 log<sub>10</sub> TCID<sub>50</sub> per carrier.  
 65 The test plate corresponding to the UV-C disinfection treatment had a  $\geq 4.40$  log<sub>10</sub> reduction ( $\geq$   
 66 99.996%) in viral titer relative to the titer of the corresponding recovery control plate.  
 67

| <b>Recovery Control</b>             |                               |                               |                               |
|-------------------------------------|-------------------------------|-------------------------------|-------------------------------|
|                                     | Replicate 1                   | Replicate 2                   | Replicate 3                   |
| TCID <sub>50</sub> per 0.1 ml       | 5.00 log <sub>10</sub>        | 5.00 log <sub>10</sub>        | 5.00 log <sub>10</sub>        |
| TCID <sub>50</sub> per Carrier      | 5.30 log <sub>10</sub>        | 5.30 log <sub>10</sub>        | 5.30 log <sub>10</sub>        |
| Avg. TCID <sub>50</sub> per 0.1 ml  | 5.00 log <sub>10</sub>        |                               |                               |
| Avg. TCID <sub>50</sub> per Carrier | 5.30 log <sub>10</sub>        |                               |                               |
| <b>UV-C Exposure</b>                |                               |                               |                               |
|                                     | Replicate 1                   | Replicate 2                   | Replicate 3                   |
| TCID <sub>50</sub> per 0.1 ml       | 0.75 log <sub>10</sub>        | $\leq 0.50$ log <sub>10</sub> | $\leq 0.50$ log <sub>10</sub> |
| TCID <sub>50</sub> per Carrier      | 1.05 log <sub>10</sub>        | $\leq 0.80$ log <sub>10</sub> | $\leq 0.80$ log <sub>10</sub> |
| Avg. TCID <sub>50</sub> per 0.1 ml  | $\leq 0.60$ log <sub>10</sub> |                               |                               |

|                                                                |                          |
|----------------------------------------------------------------|--------------------------|
| Avg. TCID <sub>50</sub> per Carrier                            | ≤ 0.90 log <sub>10</sub> |
| Avg. log <sub>10</sub> Reduction<br>(Test relative to control) | ≥ 4.40 log <sub>10</sub> |
| Avg. Percent Reduction<br>(Test relative to control)           | ≥ 99.996 %               |

68

69 Table 1. The average TCID<sub>50</sub> per carrier is shown for both the recovery and test replicates. The  
70 average log<sub>10</sub> and percent reduction for the test condition relative to control is also provided.

71

## 72 Discussion

73

74 Monkeypox is an important emerging pathogen that can lead to deep seeded lesions across the  
75 body and may result in more infections than originally believed. In this study, a mobile UV-C  
76 tower equipped with high-performance bulbs successfully inactivated ≥ 99.996 % (≥ 4.40 log<sub>10</sub>)  
77 of the vaccinia virus, a monkeypox surrogate, in less than 7 minutes. There are two published  
78 reports exploring the susceptibility of vaccinia aerosols to UV-C.<sup>5,6</sup> However, prolonged direct  
79 contact with a virion source is the emerging transmission route for human monkeypox.

80 Technological innovations in recent years led to the development of faster, accessible, and high-  
81 performing UV-C devices<sup>7</sup> that also incorporate safety sensors to eliminate accidental UV-C  
82 exposures. While this study focused on an emerging pathogen, the germicidal properties of UV-  
83 C light are not species-specific. Rather, UV-C inactivates microorganisms by causing damage to  
84 their nucleic acids. In conclusion, UV-C disinfection is an effective pathogen suppression  
85 technology that can be easily deployed in healthcare and community settings for the prevention  
86 and control of pathogens that may persist in the environment.

87

## 88 Acknowledgements

89

90 The authors would like to thank Dr. Benjamin Tanner and Microchem Laboratories (Austin, TX)  
91 for their commitment to this project.

92

## 93 References

94

- 95 1- Otu A, Ebenso B, Walley J, Barceló JM, Ochu CL. Global human monkeypox outbreak:  
96 atypical presentation demanding urgent public health action. *Lancet Microbe*. 2022  
97 Aug;3(8):e554-e555. doi: 10.1016/S2666-5247(22)00153-7. Epub 2022 Jun 7. PMID:  
98 35688169.
- 99 2- Weaver JR, Isaacs SN. Monkeypox virus and insights into its immunomodulatory proteins.  
100 *Immunol Rev*. 2008 Oct;225:96-113. doi: 10.1111/j.1600-065X.2008.00691.x. PMID:  
101 18837778; PMCID: PMC2567051.
- 102 3- Sah R, Mohanty A, Hada V, et al. (September 18, 2022) The Emergence of Monkeypox: A  
103 Global Health Threat. *Cureus* 14(9): e29304. doi:10.7759/cureus.29304
- 104 4- Andrea M. McCollum, Inger K. Damon, Human Monkeypox, *Clinical Infectious Diseases*,  
105 Volume 58, Issue 2, 15 January 2014, Pages 260–267, <https://doi.org/10.1093/cid/cit703>
- 106 5- McDevitt JJ, Lai KM, Rudnick SN, Houseman EA, First MW, Milton DK. Characterization  
107 of UVC light sensitivity of vaccinia virus. *Appl Environ Microbiol*. 2007 Sep;73(18):5760-6.  
108 doi: 10.1128/AEM.00110-07. Epub 2007 Jul 20. PMID: 17644645; PMCID: PMC2074914.

- 109 6- JENSEN MM. INACTIVATION OF AIRBORNE VIRUSES BY ULTRAVIOLET  
110 IRRADIATION. *Appl Microbiol.* 1964 Sep;12(5):418-20. doi: 10.1128/am.12.5.418-  
111 420.1964. PMID: 14215971; PMCID: PMC1058147.
- 112 7- Shining a light on COVID-19. *Nat. Photonics* 14, 337 (2020).  
113 <https://doi.org/10.1038/s41566-020-0650-9>  
114  
115  
116  
117  
118  
119
